# Supplementary material for: Inactivation of the type I interferon pathway reveals long double‐stranded RNA‐mediated RNA interference in mammalian cells
Source: PubMed Central journal article supplement (PMC5167344; doi:10.15252/embj.201695086), 2016-11-04
Supplement: EMBJ-35-2505-s003.pdf [file EMBJ-35-2505-s003.pdf]

**A**

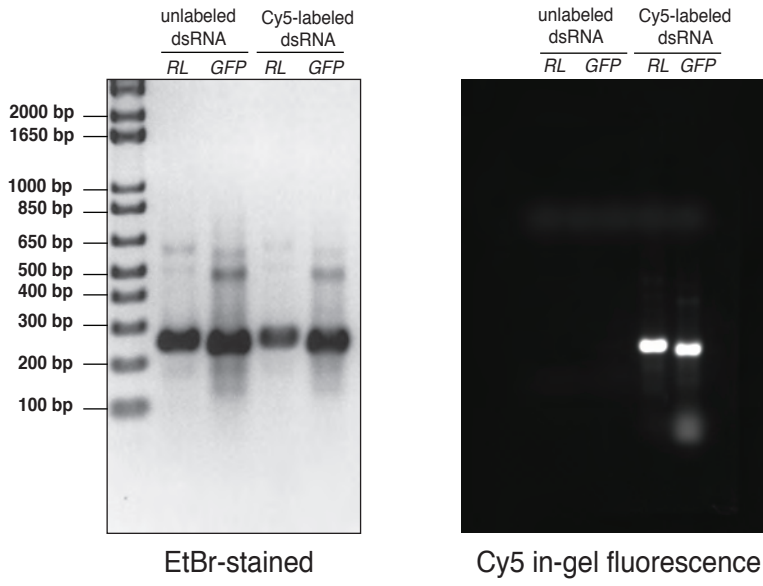

**Figure 1- Source data**
