# Supplementary material for: Inactivation of the type I interferon pathway reveals long double‐stranded RNA‐mediated RNA interference in mammalian cells
Source: PubMed Central journal article supplement (PMC5167344; doi:10.15252/embj.201695086), 2016-11-04
Supplement: EMBJ-35-2505-s004.pdf [file EMBJ-35-2505-s004.pdf]

**A**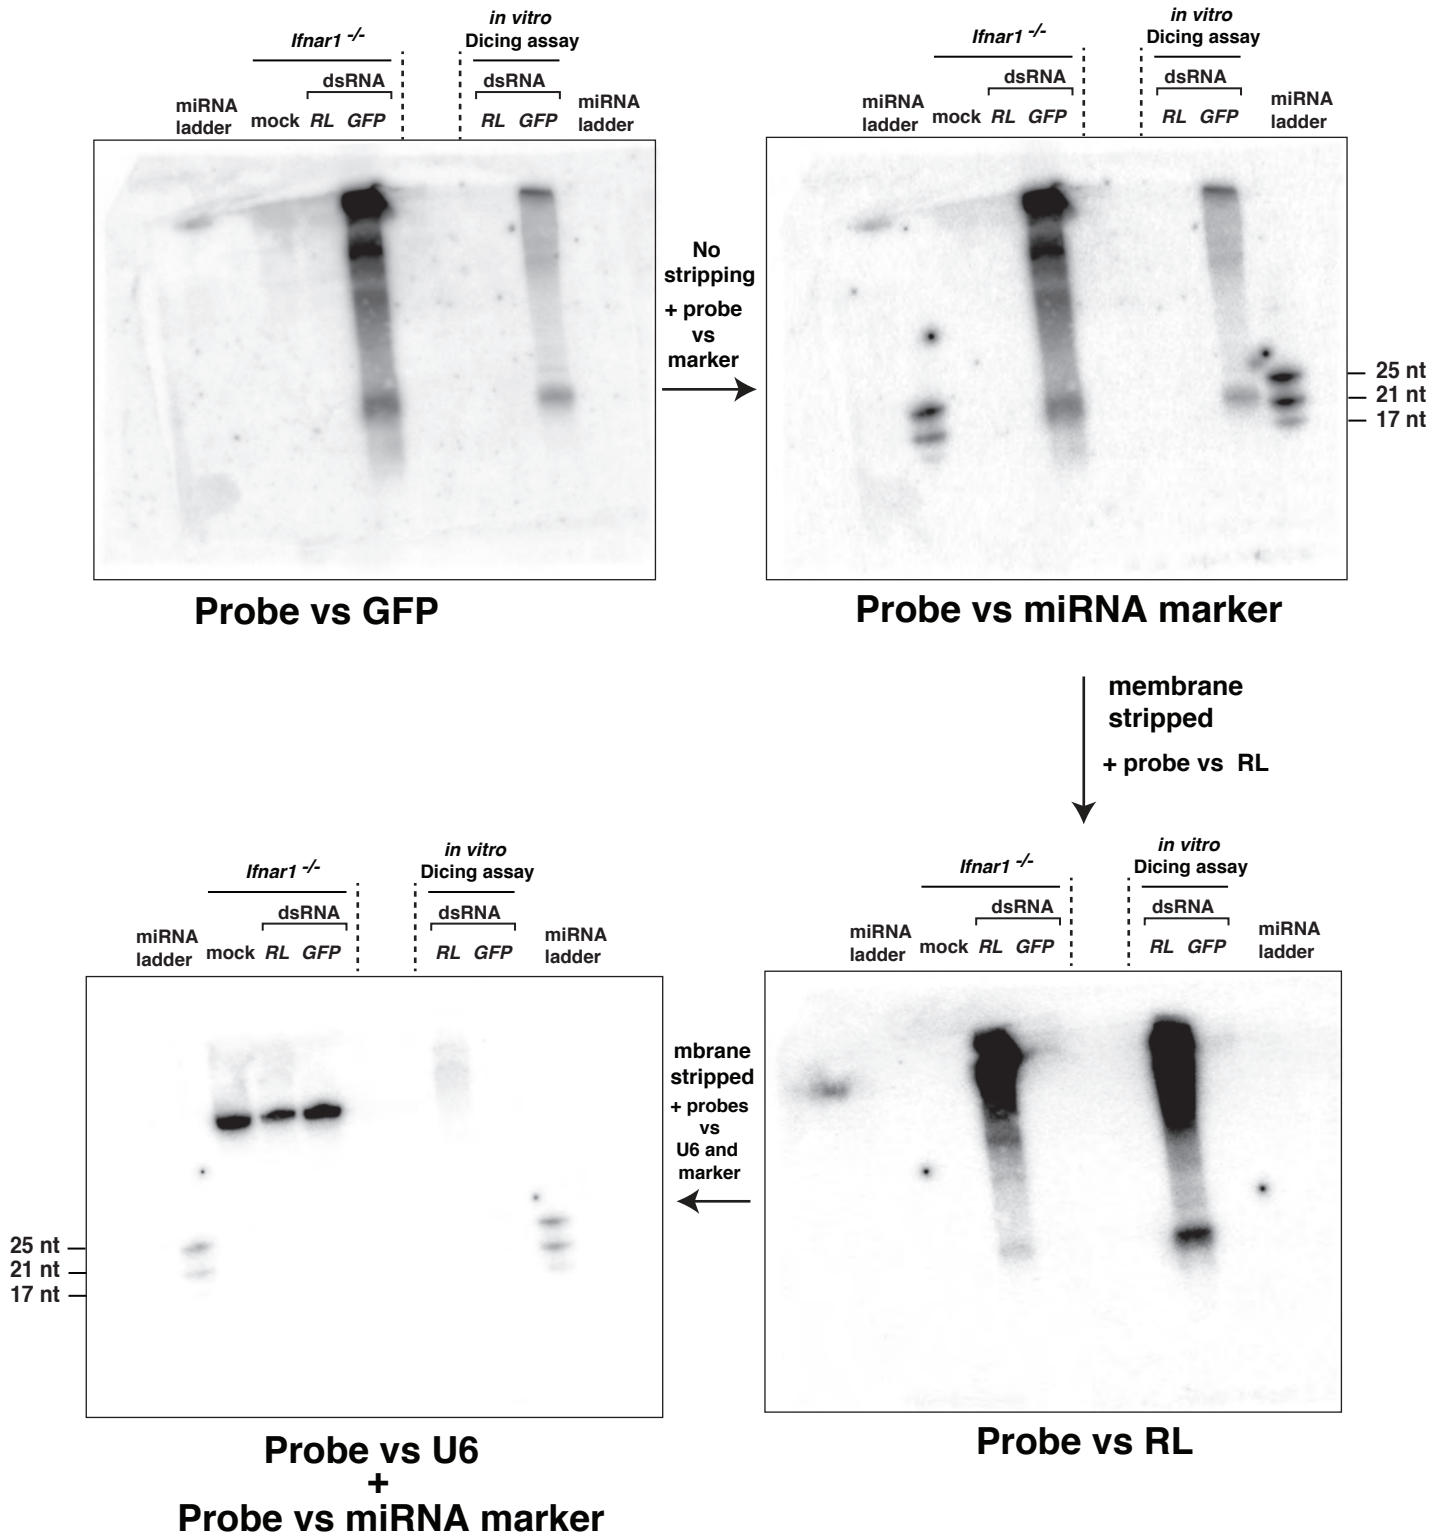

**Note:** Blots were exposed to a storage phosphor screen and scanned using Typhoon FLA 7000 apparatus. The displayed images are the acquired scans after global Auto-Contrast and Brightness/Contrast adjustments.

**Figure 4- Source data**

**B**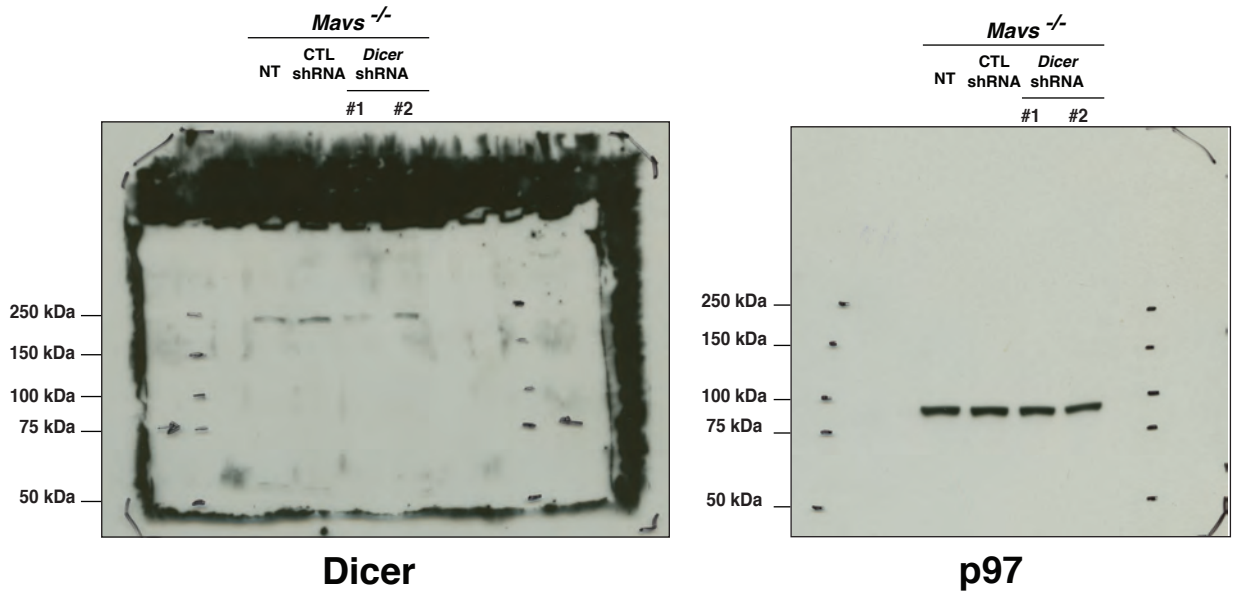**D**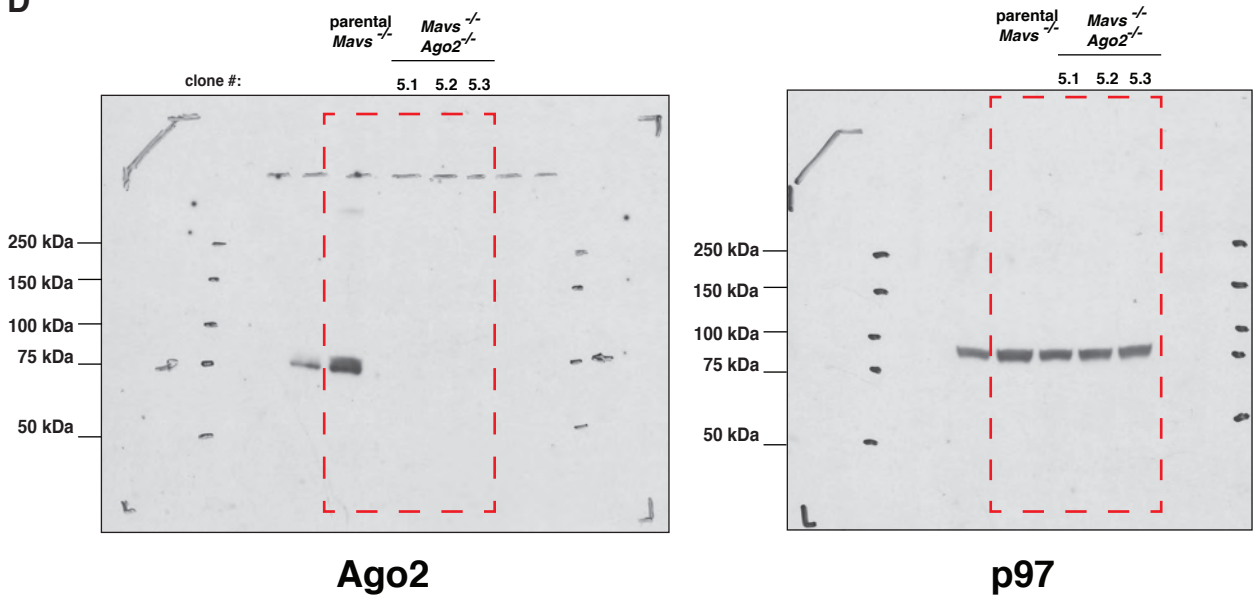**Figure 4- Source data**
