# Supplementary material for: Inactivation of the type I interferon pathway reveals long double‐stranded RNA‐mediated RNA interference in mammalian cells
Source: EMBO J. 2016 Nov 4;35(23):2505–18. doi: 10.15252/embj.201695086 (PMC5167344; doi:10.15252/embj.201695086)
Supplement: Supplementary file 1 — Appendix [file EMBJ-35-2505-s001.pdf]

## **Appendix**

### **Inactivation of the type I interferon pathway reveals long double stranded RNA-mediated RNA interference in mammalian cells**

Pierre V. Maillard<sup>1</sup>, Annemarie G. Van der Veen<sup>1</sup>, Safia Deddouche-Grass<sup>1†</sup>, Neil C. Rogers<sup>1</sup>, Andres Merits<sup>2</sup> & Caetano Reis e Sousa<sup>1</sup>

<sup>1</sup> Immunobiology Laboratory, The Francis Crick Institute, 1 Midland Road, London NW1 1AT, UK.

<sup>2</sup> Institute of Technology, University of Tartu, 50411 Tartu, Estonia.

<sup>†</sup>Present address: Open Innovation Access Platform, Sanofi Strasbourg, 16 rue d'Ankara, 67080 Strasbourg France.

## **Appendix table of contents**

Appendix Figures S1-S7

Appendix Figure legends S1-S7

Appendix Table S1

**A**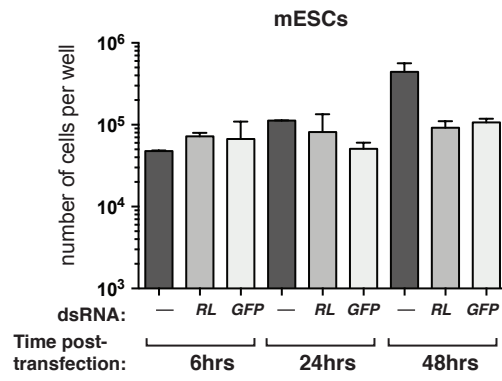**B**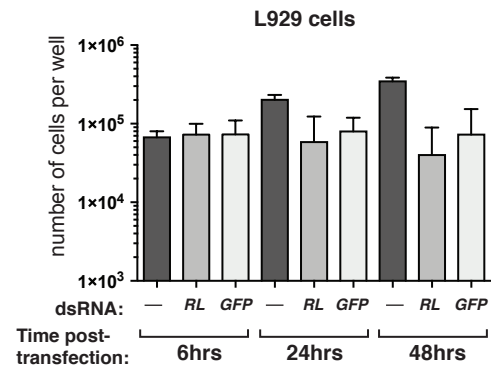**Appendix Figure S1**

**A**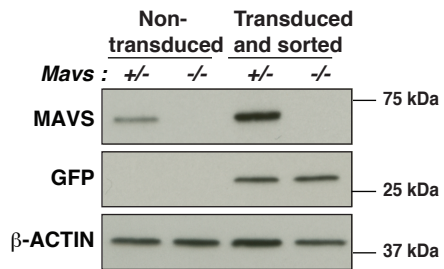**B**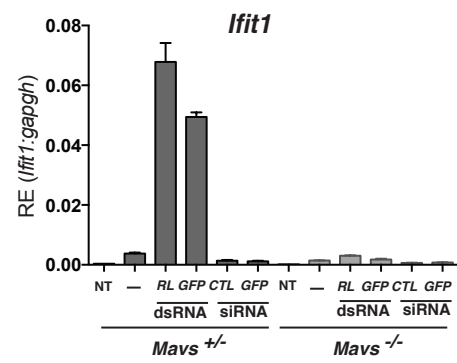**C**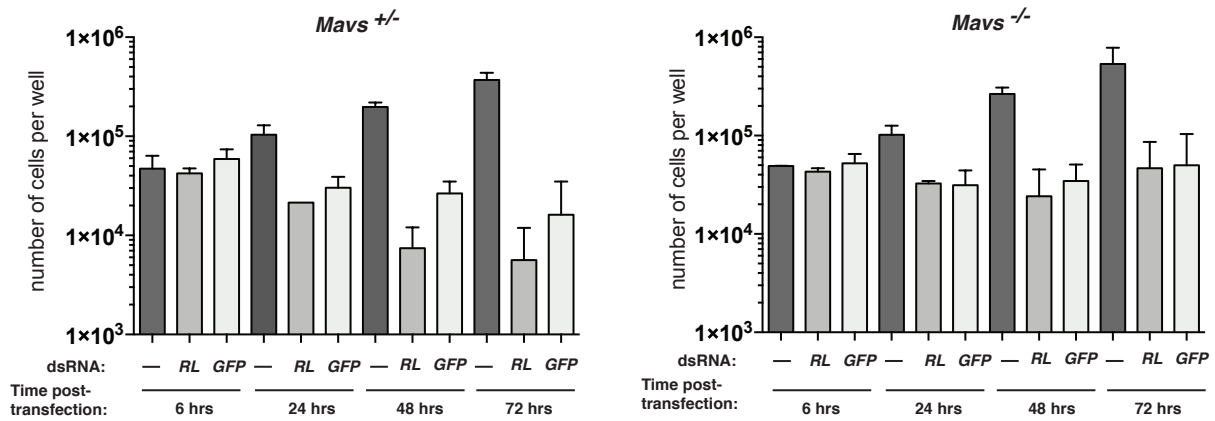**D**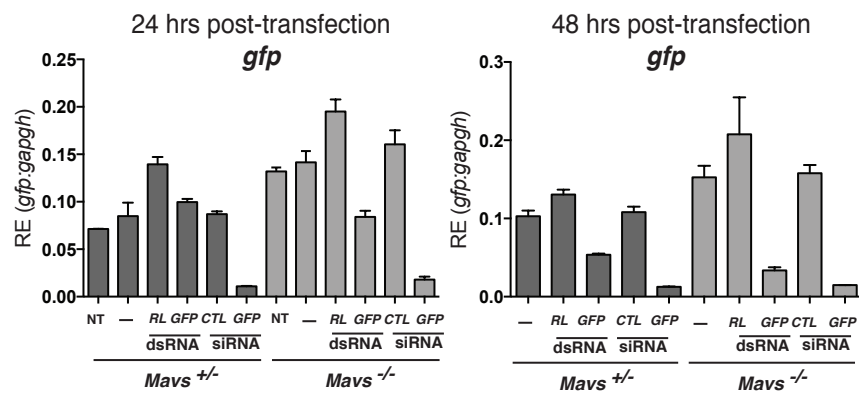**Appendix Figure S2**

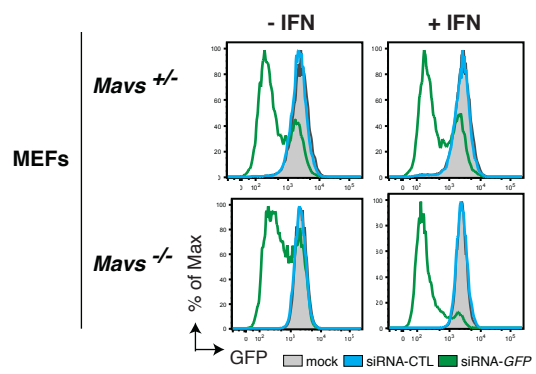

Appendix Figure S3

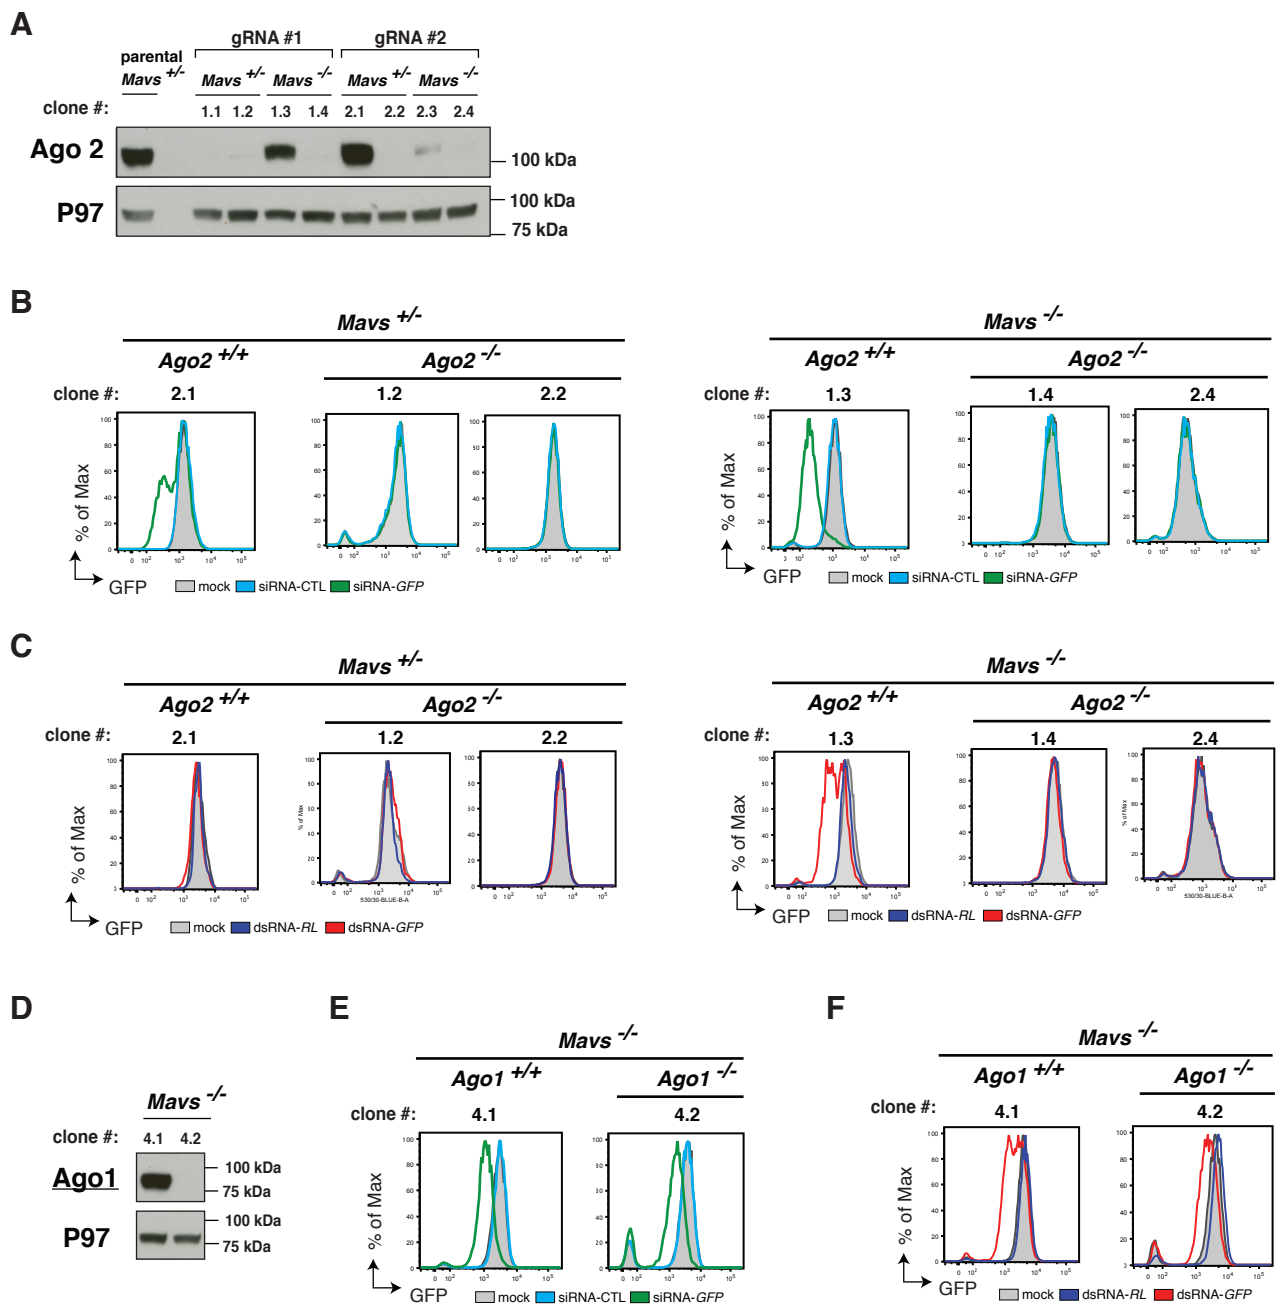

Appendix Figure S4

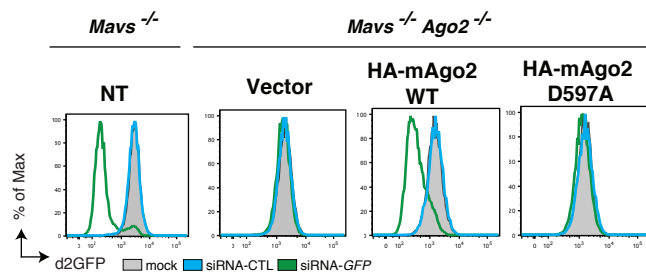

**Appendix Figure S5**

**A**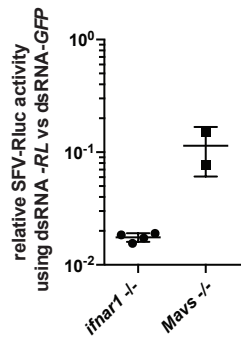**B**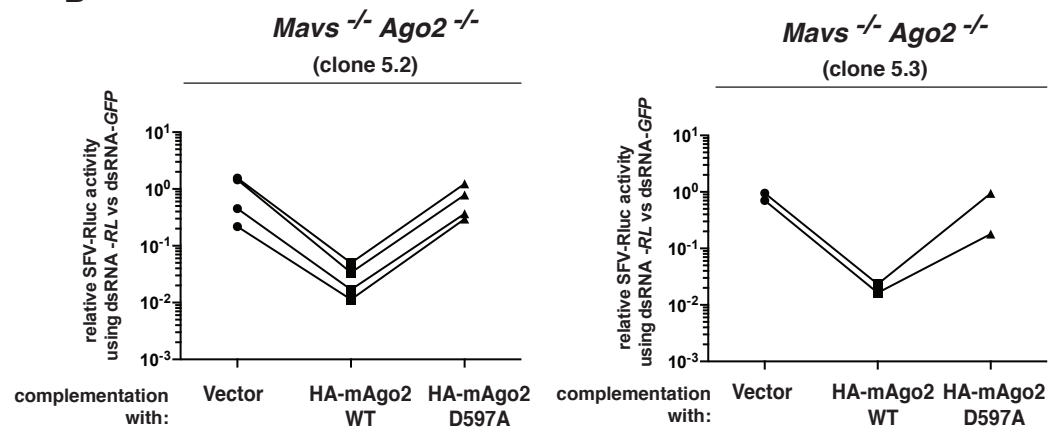**Appendix Figure S6**

**A**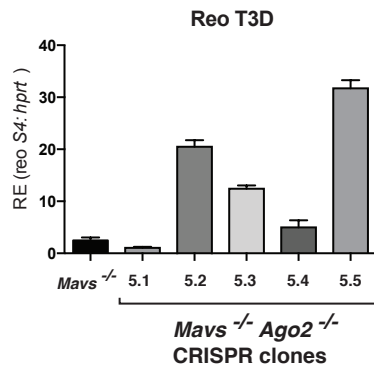**B**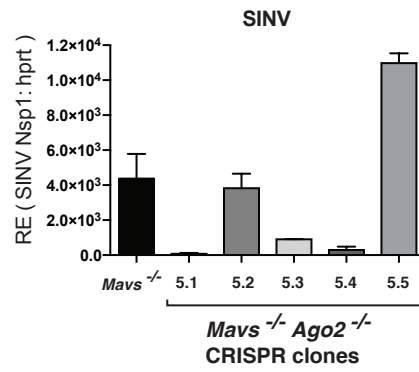**C**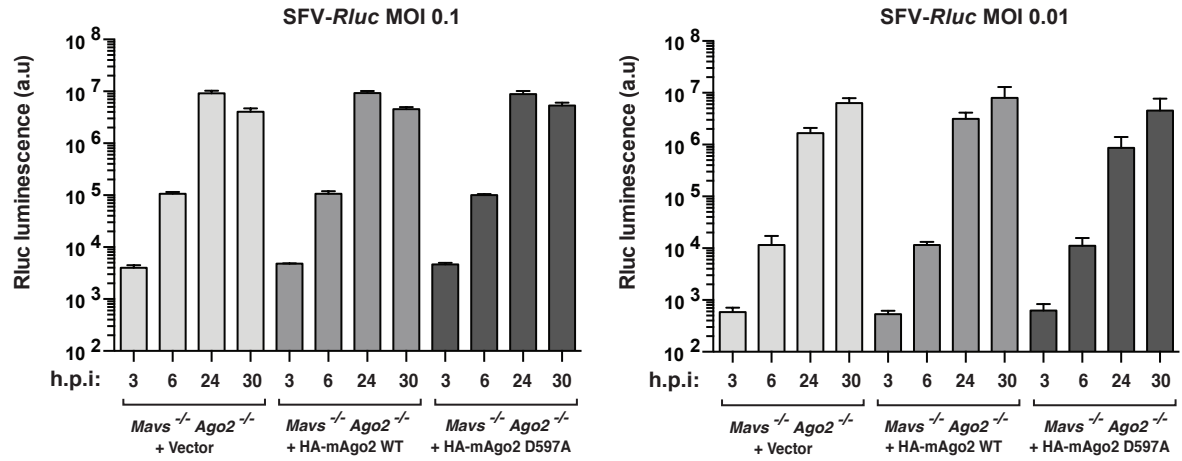**D**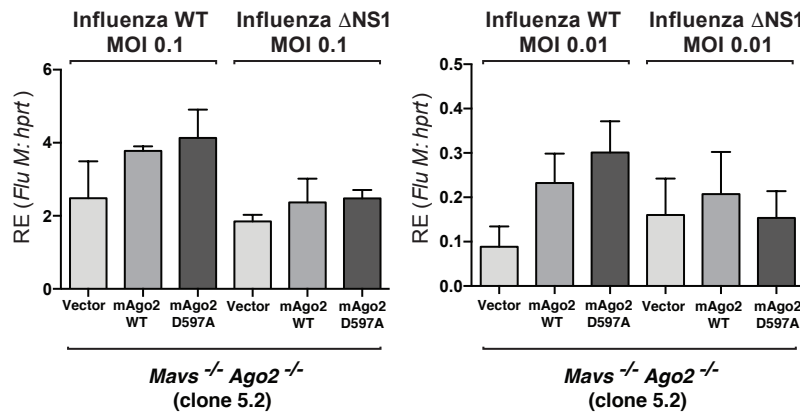**E**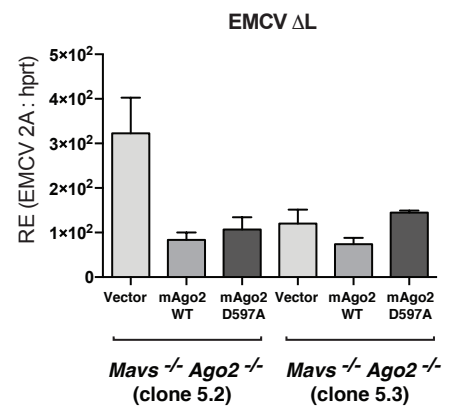**Appendix Figure S7**

## Appendix Figure legends

**Appendix Figure S1. Cytotoxicity induced by transfection of long dsRNA.** (A) mESCs or (B) L929 cell numbers after dsRNA or mock (–) transfection at various time-points as indicated. Data show mean and SD of 2 independent experiments.

**Appendix Figure S2. Sequence-specific gene silencing by long dsRNA in *Mavs*<sup>+/-</sup> and *Mavs*<sup>-/-</sup> MEFs.** (A) Immunoblot of Mavs and GFP in *Mavs*<sup>+/-</sup> and *Mavs*<sup>-/-</sup> MEFs transduced with a GFP-expressing lentiviral vector and FACSSorted for GFP positive cells or left untransduced.  $\beta$ -actin served as loading control. (B) *Mavs*<sup>+/-</sup> and *Mavs*<sup>-/-</sup> MEFs stably expressing GFP were transfected with the indicated Cy5-labeled dsRNAs or siRNAs. Relative expression (RE) of the interferon-stimulated gene *Ifit1* was assessed 24 hrs post-transfection by qRT-PCR and normalised by *Gapdh*. Graph shows mean and SD of biological duplicates. (C) *Mavs*<sup>+/-</sup> and *Mavs*<sup>-/-</sup> MEFs cell numbers after dsRNA or mock (–) transfection at various time-points as indicated. (D) Same experiment as in (B) but the relative expression of *gfp* was measured and normalised by *Gapdh* 24 hrs (left graph) and 48 hrs (right graph) post-transfection of the indicated dsRNA or siRNA. Data show mean and SD of 2 biological duplicates (B-C) or 2 independent experiments (D).

**Appendix Figure S3. Sequence-specific gene silencing induced by siRNAs is not affected by IFN treatment.** *Mavs*<sup>+/-</sup> and *Mavs*<sup>-/-</sup> MEFs stably expressing d2GFP were stimulated with recombinant IFN A/D (200U/ml) 24 hrs prior transfection with siRNA as indicated. IFN A/D treatment was maintained for 2 days post-transfection and then GFP level was monitored. Histograms plots are representative of 3 independent experiments. Each histogram represents a sample size of 10 000 cells.

**Appendix Figure S4. Sequence-specific gene silencing by long dsRNA is Ago2-dependent and Ago1-independent.** (A) Immunoblot of Ago2 in parental *Mavs*<sup>+/-</sup> MEFs stably expressing GFP and in two independent *Mavs*<sup>+/-</sup> *Ago2*<sup>-/-</sup> and *Mavs*<sup>-/-</sup> *Ago2*<sup>-/-</sup> clones generated by CRISPR/CAS9-mediated genome engineering using two sets of short guide RNAs (sgRNA #1 and sgRNA #2). Some clones (clones 1.3 and 2.1) retained wild type expression of Ago2. P97 served as loading control. (B) Two *Mavs*<sup>+/-</sup> *Ago2*<sup>-/-</sup> and two *Mavs*<sup>-/-</sup> *Ago2*<sup>-/-</sup> clones (from distinct sets of sgRNAs) were transfected with the indicated siRNA (top plots) or dsRNA (bottom plots) and GFP level was measured 3 days later. Clones 1.3 and 2.1, which retained wild type expression of Ago2, as mentioned in (A), were also analysed. (C) Same cells described in (B) were transfected with the indicated dsRNA and GFP level was analysed 3 days later. (D) Immunoblot of Ago1 in a *Mavs*<sup>-/-</sup> *AGO1*<sup>-/-</sup> clone (# 4.2) generated by CRISPR/CAS9-mediated genome engineering versus a clone (# 4.1) that retained wild type expression of Ago1. P97 served as loading control. (E) Clones from (D) were transfected with the indicated siRNA and GFP level measured 3 days later. (F) Clones from (D) were transfected with the indicated dsRNA and GFP level was analysed 3 days later. All histograms plots are representative of 2 independent experiments. Each histogram represents a sample size of 10 000 cells.

**Appendix Figure S5. Ago2 catalytic activity is essential for silencing mediated by siRNA.** *Mavs*<sup>-/-</sup> *Ago2*<sup>-/-</sup> clones (clone 5.2) stably expressing d2GFP and transduced with the empty vector or a vector expressing HA-tagged wild-type (HA-mAgo2 WT) or catalytic mutant version of mouse Ago2 (HA-mAgo2 D597A) were transfected with the indicated siRNA and d2GFP was analysed 2 days later. Histograms plots are

representative of 2 independent experiments. Each histogram represents a sample size of 10 000 cells.

**Appendix Figure S6. Introduction of dsRNA in IFN-deficient cells provides sequence-specific antiviral activity.**

(A) Relative SFV-Rluc activity at 24 h.p.i in *Ifnar1*<sup>-/-</sup> or *Mavs*<sup>-/-</sup> MEFs previously transfected with dsRNA-*RL* versus dsRNA-*GFP* as described in Fig 6A and Fig 6C. Each dot represents an independent experiment (B) Same as in (A) but with *Mavs*<sup>-/-</sup> *Ago2*<sup>-/-</sup> clones (clone 5.2 and 5.3) individually complemented to express wild-type (HA-mAgo2 WT) or a catalytic mutant (HA-mAgo2 D597A) version of mAgo2 or transduced with a control vector as described in Fig 6D.

**Appendix Figure S7. RNAi does not appreciably impact antiviral resistance in unvaccinated IFN-deficient cells.**

(A) Parental *Mavs*<sup>-/-</sup> MEFs and 5 different *Mavs*<sup>-/-</sup> *Ago2*<sup>-/-</sup> clones (clone 5.1-5.5) were infected with Reovirus strain type 3 Dearing (Reo T3D) at an MOI 0.01. The relative level of reovirus gene segment S4 genome was measured at 24 h.p.i. and normalised to *Hprt*. Data show mean and SD of 2 biological duplicates. (B) Same cells as in (A) were infected with Sindbis virus (SINV) at an MOI 0.01. The relative level of SINV *Nsp1* gene was measured at 24 h.p.i. and normalised to *Hprt*. Data show mean and SD of biological duplicates. (C) *Mavs*<sup>-/-</sup> *Ago2*<sup>-/-</sup> clones (clone 5.2) expressing d2GFP and transduced with the empty vector or a vector expressing HA-tagged wild-type (HA-mAgo2 WT) or catalytic mutant version of mouse Ago2 (HA-mAgo2 D597A) were infected with an MOI 0.1 (left panel) or an MOI 0.01 (right panel) of SFV-Rluc. *Renilla* luciferase activity was measured 24 hours later. Each bar represents mean +

SD of biological triplicates. The results are representative of 2 independent experiments. **(D)** Same cells as in (C) were infected with Influenza A/PR/8/34 WT and Influenza A/PR/8/34  $\Delta$ NS1 at MOI 0.1 or 0.01 and the relative level of M segment was measured at 24 h.p.i. and normalised to *Hprt*. Data show mean and SD of biological triplicates. **(E)** Same as in (C) but cells were infected with EMCV  $\Delta$ L at MOI 0.001. Data show mean and SD of biological duplicates.

**Appendix Table S1. List of Primers used in this study****Probes for Northern analysis**

| Description  | Primer name          | Primer sequence (5' to 3')                      |
|--------------|----------------------|-------------------------------------------------|
| U6           | U6_NB_probe          | GCAGGGGCCATGCTAATCTTCTCTGTATCG                  |
| miRNA marker | miRNAMarker_NB_probe | AAATCTCAACCAGCCACTGCT                           |
| GFP          | GFP_T7_IVT_sense_Fwd | GAAATTAATACGACTCACTATAGGGAGAATGGTGAGCAAGGGCG    |
|              | GFP_IVT_sense_Rev    | AAGCACTGCACGCCGTAGG                             |
| RL           | RL_T7_IVT_sense_Fwd  | GAAATTAATACGACTCACTATAGGGAGAATGACTTCGAAAGTTTATG |
|              | RL_T7_IVT_sense_Rev  | TGGCTCAATATGTGG                                 |

**Primers used for *in vitro* transcription**

| Description   | Primer name              | Primer sequence (5' to 3')                      |
|---------------|--------------------------|-------------------------------------------------|
| GFP-sense     | GFP_T7_IVT_sense_Fwd     | GAAATTAATACGACTCACTATAGGGAGAATGGTGAGCAAGGGCG    |
|               | GFP_IVT_sense_Rev        | AAGCACTGCACGCCGTAGG                             |
| GFP-antisense | GFP_T7_IVT_antisense_Fwd | GAAATTAATACGACTCACTATAGGGAGAAAGCACTGCACGCCG     |
|               | GFP_T7_IVT_antisense_Rev | ATGGTGAGCAAGGGCGAGGAGC                          |
| RL-sense      | RL_T7_IVT_sense_Fwd      | GAAATTAATACGACTCACTATAGGGAGAATGACTTCGAAAGTTTATG |
|               | RL_IVT_sense_Rev         | TGGCTCAATATGTGG                                 |
| RL-antisense  | RL_T7_IVT_antisense_Fwd  | GAAATTAATACGACTCACTATAGGGAGATGGCTCAATATGTGG     |
|               | RL_T7_IVT_antisense_Rev  | ATGACTTCGAAAGTTTATG                             |

**Primers used for cloning and site-directed mutagenesis**

| Description                             | Primer name          | Primer sequence (5' to 3')                                  |
|-----------------------------------------|----------------------|-------------------------------------------------------------|
| To clone d2GFP into pRRLsin_PGK plasmid | d2GFP_cloning_Fwd    | CGCGGATCCACGGTCCGCCACCATGGTGAGCAAGGGC                       |
|                                         | d2GFP_cloning_Rev    | ACGCGTCGACGGGCCGCTTTACACATTGATCCTAGC                        |
| To clone HA-mAgo2 into pLHCX plasmid    | HA-mAGO2_cloning_Fwd | CCCAAGCTTGCCACCATGTACCCTTATGACGTGCCGATTACGCTATGTACTCGGGAGCC |
|                                         | mAGO2_cloning_Rev    | CCATCGATTCAAGCAAAGTACATGG                                   |
| To insert mutation D597A into mAgo2     | mAGO2 D597A_Fwd      | CATCTTCCTGGGAGCGCTGTCACCCACCCACC                            |
|                                         | mAGO2 D597A_Rev      | GGTGGGTGGGTGACAGCGGCTCCAGGAAGATG                            |

**Primers used for qRT-PCR**

| Description                   | Primer name          | Primer sequence (5' to 3')   |
|-------------------------------|----------------------|------------------------------|
| S4 segment reovirus T3D       | Reo_S4 qRT_Fwd       | CGCTTTTGAAGTCTGTGTATCA       |
|                               | Reo_S4 qRT_Rev       | CTGGCTGTGCTGAGATTGTTTT       |
| NSP1 gene of Sindbis virus    | Sindbis_NSPI qRT_Fwd | CACTCCAAATGACCATGC           |
|                               | Sindbis_NSPI qRT_Rev | GGTGCTCGGAAACATTC            |
| M gene of Influenza virus PR8 | INF_NSPI qRT_Fwd     | CAAGCAGCAGAGGCCATGGA         |
|                               | INF_NSPI qRT_Rev     | GACCAGCACTGGAGCTAGGA         |
| 2A gene of EMCV               | EMCV_2A qRT_Fwd      | AGGCGGTTCTAAGAGCAGAACCAT     |
|                               | EMCV_2A qRT_Rev      | AGTGGGCATTGAAGATCCGGTACA     |
| HPRT                          | HPRT_ qRT_Fwd        | TGAAGAGCTACTGTAATGATCAGTCAAC |
|                               | HPRT_ qRT_Rev        | AGCAAGCTTGCAACCTTAACCA       |

**Primers used for CRISPR/Cas9-mediated genome engineering**

| Description                             | Primer name            | Primer sequence (5' to 3') |
|-----------------------------------------|------------------------|----------------------------|
| CRISPR for mouse Ago2, target in exon 2 | mAgo2_exon2_CRISPR_Fwd | CACCGTGGTGCCGAAGTCCGGCCG   |
|                                         | mAgo2_exon2_CRISPR_Rev | AAACCGCCGGACTTCGGCACCAC    |
| CRISPR for mouse Ago2, target in exon 4 | mAgo2_exon4_CRISPR_Fwd | CACCGATCGTCTCGAAGGGGACGC   |
|                                         | mAgo2_exon4_CRISPR_Rev | AAACGCGTCCCTTCGAGACGATC    |
| CRISPR for mouse Ago1, target in exon 2 | mAgo1_exon2_CRISPR_Fwd | CACCGATTGACGTTTACCATTACG   |
|                                         | mAgo1_exon2_CRISPR_Rev | AAACCGTAATGGTAAACGTCAATC   |
